# Supplementary material
Source: PubMed Central journal article supplement (PMC6570493)
Supplement: NIHMS963479-supplement-2.pdf [file NIHMS963479-supplement-2.pdf]

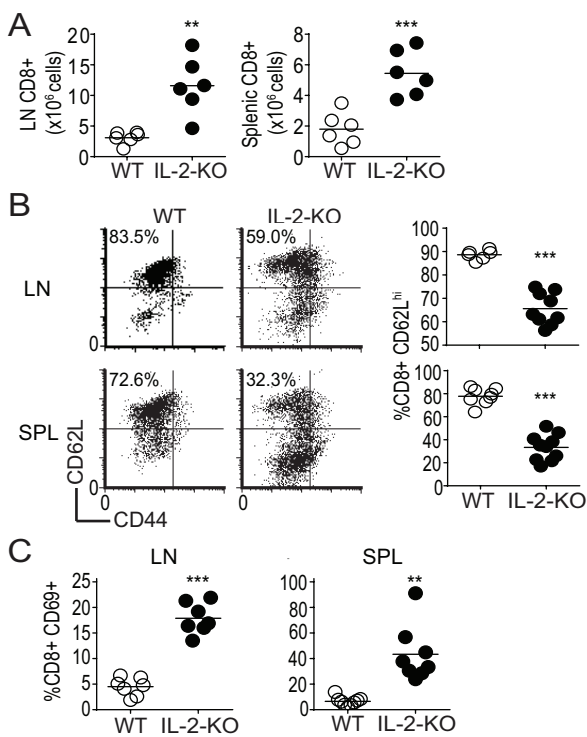

**Supplemental Figure. 1. IL-2-KO CD8 T cells are activated and expanded during autoimmune disease.** Peripheral LN cells and splenocytes were isolated from 19-29 day old WT or IL-2-KO mice, stained and analyzed by flow cytometry. (A) CD8 T cell counts determined by flow cytometry and hemocytometer cell counting. Percentage of LN and splenic CD8 T cells that express surface CD62L and CD44 (B), and CD69 (C). Each symbol indicates an individual animal. Data is representative of 3-6 independent experiments. Statistics: unpaired Student's t-test without a Welch correction relative to WT. \*  $p < 0.05$ ; \*\*  $p < 0.01$ ; \*\*\*  $p < 0.001$ .

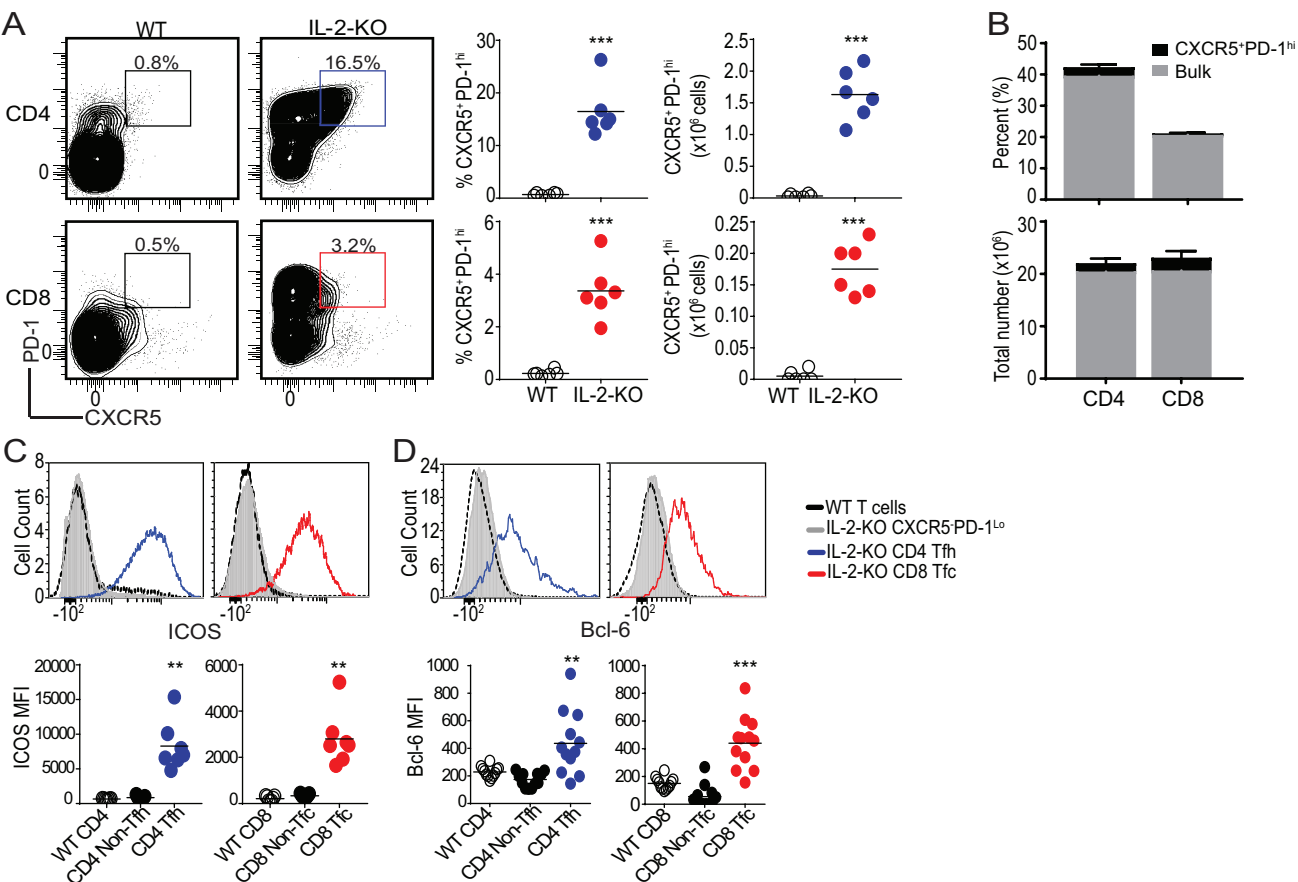

**Supplemental Figure 2. Splenic CD8 T cells express markers of follicular helpers.** (A) Flow cytometric analysis of CXCR5 and PD-1 expression on CD4 or CD8 T cells from 18-21 day old IL-2-KO or WT splenocytes gated on CD11c<sup>+</sup>CD11b<sup>-</sup>Gr-1<sup>-</sup> cells. Representative flow plots, frequency and total number of CXCR5<sup>+</sup>PD-1<sup>hi</sup> CD4 and CD8 T cells are shown. (B) The ratio of IL-2-KO CXCR5<sup>+</sup>PD-1<sup>hi</sup> CD4 Tfh cells to bulk CD4 T cells or CD8 Tfc cells to bulk CD8 T cells by percentage and total number. (C) WT naïve bulk CD4 and CD8 T cells, IL-2-KO CD4 non-Tfh or CD8 non-Tfc (CXCR5<sup>+</sup>PD-1<sup>lo</sup>), and IL-2-KO CD4 Tfh and CD8 Tfc cells were analyzed for surface expression of ICOS. (C) Cell subsets as described in B were stimulated with PMA and ionomycin, and analyzed for Bcl6 expression by flow cytometry. Each symbol indicates an individual animal. Data is representative of 3-6 experiments. Statistics: unpaired Student's t-test \*  $p < 0.05$ ; \*\*  $p < 0.01$ , \*\*\*  $p \leq 0.0001$ .
